# Supplementary material for: Modulation of the Neuregulin 1/ErbB system after skeletal muscle denervation and reinnervation
Source: PubMed Central journal article supplement (PMC5864756; doi:10.1038/s41598-018-23454-8), 2018-03-22
Supplement: 41598_2018_23454_MOESM1_ESM.pdf [file 41598_2018_23454_MOESM1_ESM.pdf]

# **Modulation of the Neuregulin1/ErbB system after skeletal muscle denervation and reinnervation**

Michela Morano<sup>1,2</sup>, Giulia Ronchi<sup>1,2</sup>, Valentina Nicolò<sup>1</sup>, Benedetta Elena Fornasari<sup>1</sup>, Alessandro Crosio<sup>3</sup>, Isabelle Perroteau<sup>1</sup>, Stefano Geuna<sup>1,2</sup>, Giovanna Gambarotta\*<sup>1</sup>, Stefania Raimondo<sup>1,2</sup>.

<sup>1</sup> Department of Clinical and Biological Sciences, University of Torino, 10043 Orbassano, Italy

<sup>2</sup> Neuroscience Institute Cavalieri Ottolenghi (NICO), University of Torino, 10043 Orbassano, Italy

<sup>3</sup> Microsurgery Unit, AOU Città della Salute e della Scienza, PO CTO, 10126 Torino, Italy

\* Corresponding author: [giovanna.gambarotta@unito.it](mailto:giovanna.gambarotta@unito.it)

## **SUPPLEMENTARY INFORMATION**

**Supplementary Table S1.** Statistical analysis of real-time data for SDF muscle

| type of injury |            | CRUSH             |          |
|----------------|------------|-------------------|----------|
| gene           | time point | fold change       | p- value |
| ErbB2          | 7 days     | 3.28 ± 0.73       | 0.011    |
| ErbB3          | 3 days     | 2.67 ± 0.83       | 0.031    |
|                | 14 days    | 2.71 ± 0.09       | 0.022    |
| ErbB4          | 7 days     | 2.57 ± 0.8        | 0.047    |
|                | 14 days    | 3.32 ± 0.39       | 0.006    |
| NRG1 I-II      | 1 day      | 8.35 ± 3.95       | 0.002    |
| NRG1 α         | 1 day      | 4.66 ± 1.65       | 0.001    |
|                | 14 days    | 3.26 ± 0.97       | 0.015    |
| NRG1 β         | 1 day      | 12.44 ± 3.34      | 0.045    |
| NRG1 type a    | 1 day      | 13.7 ± 12.5       | 0.014    |
| NRG1 type b    | 1 day      | 13.9 ± 7.85       | 0.005    |
|                | 14 days    | 10.7 ± 6.37       | 0.011    |
| NRG1 type c    | 3 days     | -1.44 ± 0.58      | 0.012    |
|                | 7 days     | -5.64 ± 0.13      | 0.000    |
|                | 28 days    | -2.87 ± 1.6       | 0.014    |
| type of injury |            | END-TO-END REPAIR |          |
| gene           | time point | fold change       | p- value |
| ErbB2          | 14 days    | 7.92 ± 3.33       | 0.007    |
|                | 28 days    | 6.88 ± 3.0        | 0.006    |
| ErbB3          | 3 days     | 3.75 ± 1.37       | 0.013    |
|                | 28 days    | 2.81 ± 0.39       | 0.026    |
| NRG1 I-II      | 1 day      | 5.08 ± 2.78       | 0.05     |
| NRG1 α         | 1 day      | 6.87 ± 2.26       | 0.085    |
| NRG1 type a    | 28 days    | 3.44 ± 1.17       | 0.036    |
| NRG1 type b    | 1 day      | 5.30 ± 1.8        | 0.05     |
| type of injury |            | DENERVATED        |          |
| gene           | time point | fold change       | p- value |
| ErbB2          | 7 days     | 4.11 ± 1.62       | 0.003    |
|                | 28 days    | 9.95 ± 2.25       | 0.000    |
| ErbB3          | 3 days     | 2.45 ± 0.1        | 0.008    |
|                | 7 days     | 2.14 ± 0.37       | 0.029    |
|                | 28 days    | 2.92 ± 0.75       | 0.002    |
| NRG1 α         | 14 days    | 4.14 ± 2.2        | 0.023    |
| NRG1 type a    | 3 days     | 2.73 ± 0.35       | 0.039    |
|                | 14 days    | 10.08 ± 4.15      | 0.000    |
| NRG1 type b    | 14 days    | 12.12 ± 2.75      | 0.007    |
| NRG1 type c    | 1 day      | -3.03 ± 1.02      | 0.004    |
|                | 12 weeks   | 0.25 ± 0.08       | 0.027    |
| NRG1 I-II      | 12 weeks   | 0.37 ± 0.04       | 0.000    |
| NRG1 β         | 12 weeks   | 0.11 ± 0.03       | 0.01     |

Supplementary Figure S1

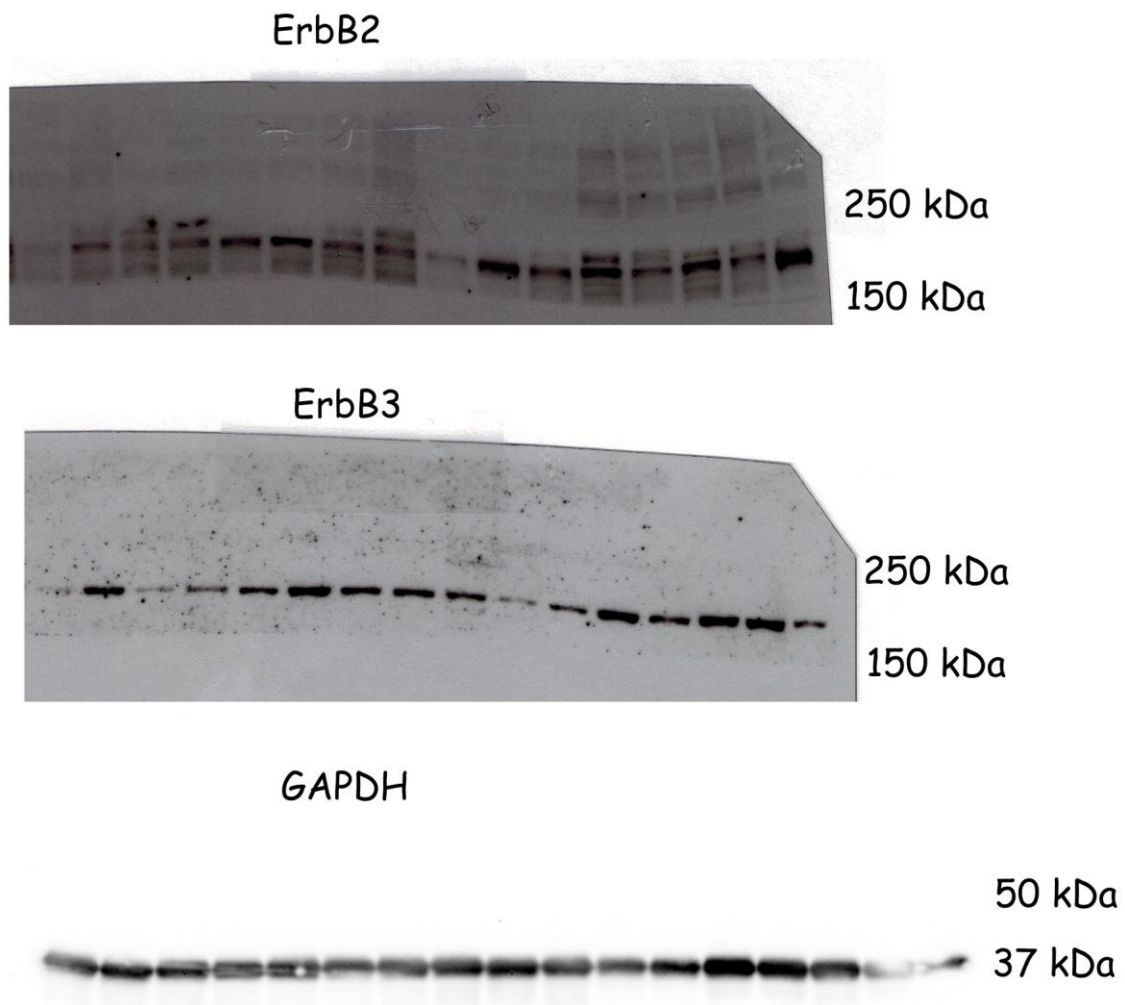

**Figure S1. Full length western blots.** Full length western blot for figure 3. The GAPDH band image was acquired using Chemidoc XRS (Biorad) and Quantity One software.

### Supplementary Figure S2

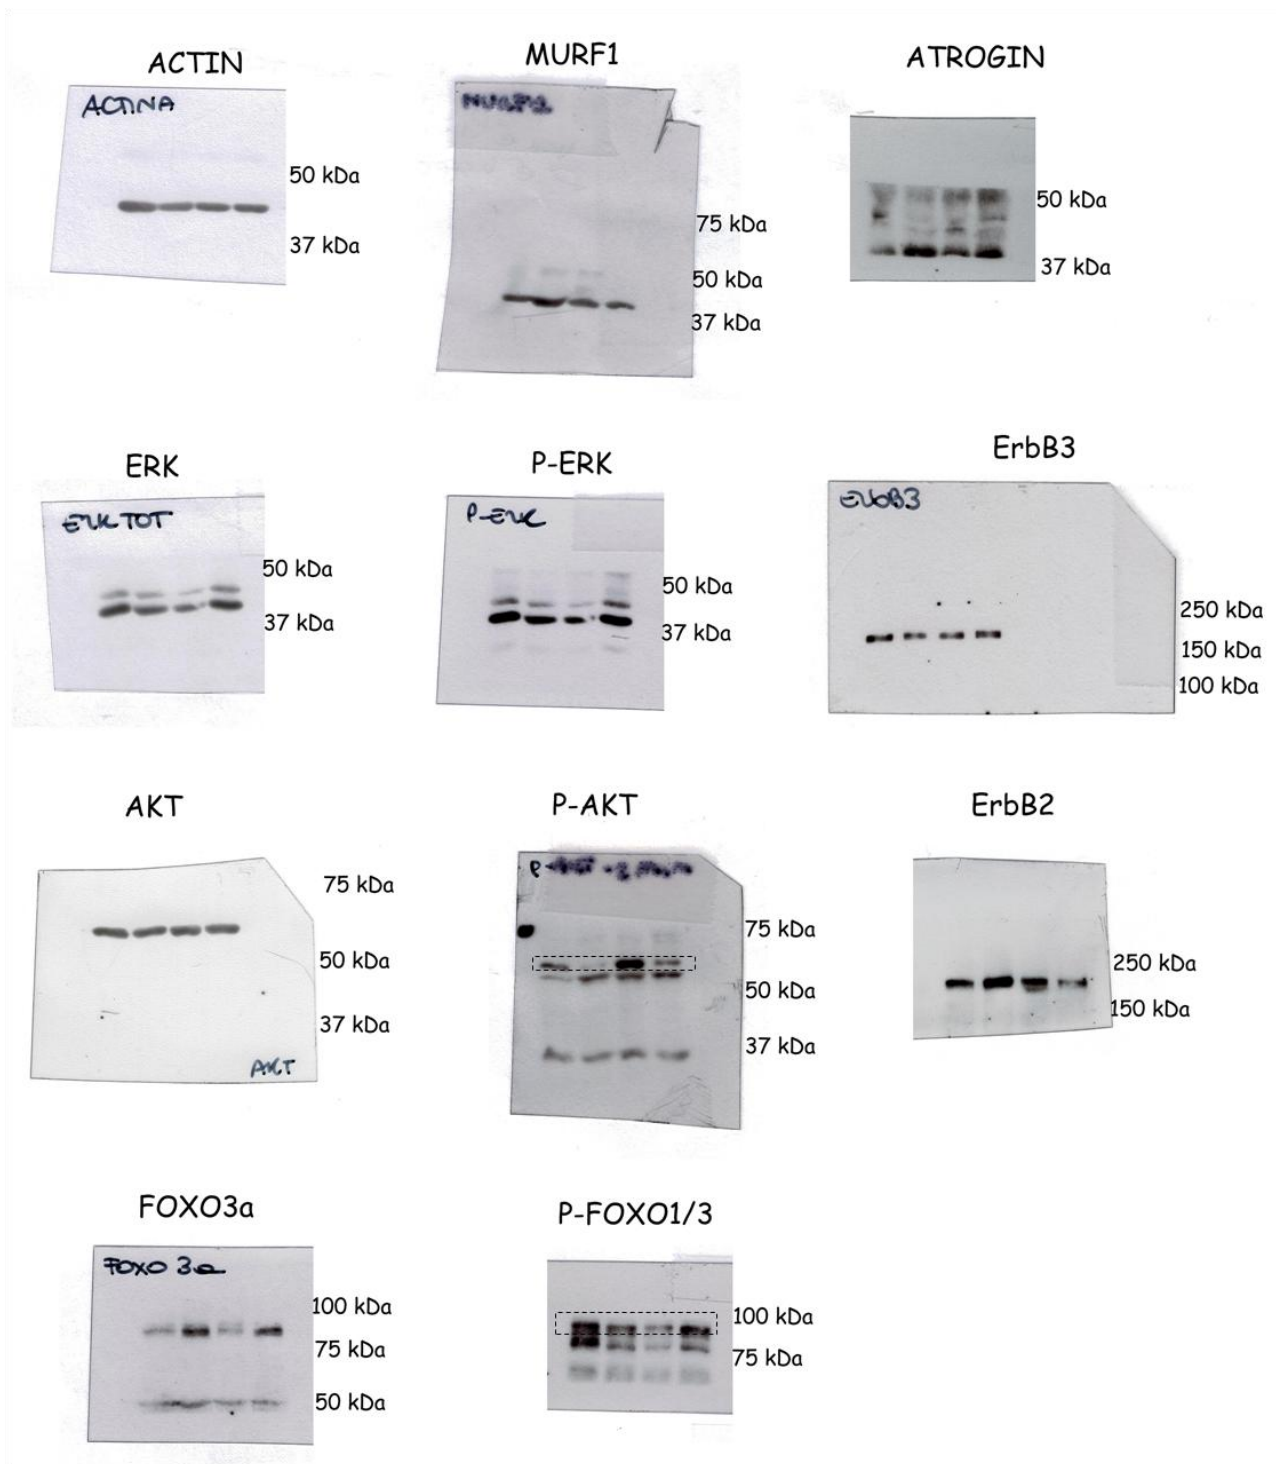

**Figure S2. Full length western blots.** Full length western blot for figure 6. The dotted box region indicates, when there is more than one visible band, the cropped portion of the blot shown in the main figure.
